# Supplementary material
Source: Springer Nature journal article supplement (https://www.springermedizin.de/resource/supplementary/12906_2010_470_MOESM4_ESM.pdf/9519566)

# Effect of Plumbagin on Con A induced T cell proliferation in collagen type II arthritis

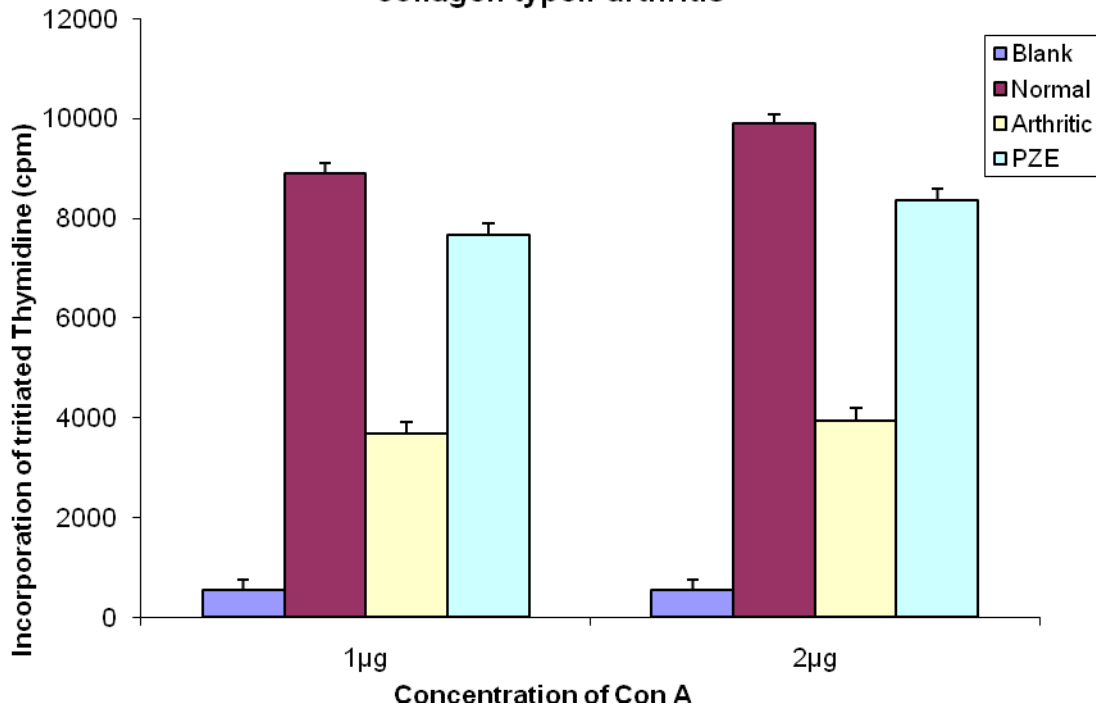

Supplement: MOESM4 [file 9519566]
